# Supplementary material for: Behavioural lapses and microbial pollution compromise the public health outcomes of safe sanitation in sustainable cities
Source: Research Square preprint supplement (doi:10.21203/rs.3.rs-8670523/v1), 2026-01-28
Supplement: Supplementary file 1 [file 8557a6a2596bbb95a00c9dd7.docx]

**Behavioural lapses and microbial pollution compromise the public health outcomes of safe sanitation in sustainable cities**

Water, Air, & Soil Pollution – An International Journal of Environmental Pollution

Edayakkal Rahmathunnisa,1 Abdulaziz Anas,1,2,* Jibin James,1 Nizam Ashraf,1,2 Sangeetha S,1 Kiran Krishna,1,2

1. CSIR-National Institute of Oceanography, Regional Centre Kochi, Kerala 682 018, India

2. Academy of Scientific and Innovative Research (AcSIR), Ghaziabad 201 002, India

*Corresponding author: [anas.nio@csir.res.in](mailto:anas.nio@csir.res.in)

Ph no: 8089080902

**Supplementary File 1: Questionnaire for survey**

**-------------------------------------------------------------------------------------**

**Citizen Science Water Quality Survey**

**CSIR- National Institute of Oceanography,**

**Regional Center Kochi**

**-------------------------------------------------------------------------------------**

**Date : _____________________________________________________________**

**Surveyor's Name : _____________________________________________________________**

**Surveyor's Address : _____________________________________________________________**

**______________________________________________________________**

**-------------------------------------------------------------------------------------**

**[Note: Please use checkmarks (✔) to indicate your responses/ നിങ്ങളുടെ പ്രതികരണങ്ങൾ സൂചിപ്പിക്കാൻ ചെക്ക്മാർക്കുകൾ (✔) ഉപയോഗിക്കുക.]**

1. **Source of drinking water/ കുടിവെള്ളത്തിന്റെ ഉറവിടം,**

- **Pipeline/ പൈപ്പ് ലൈൻ**
- **Open well/ തുറന്ന കിണർ**
- **Bore well/ കുഴൽക്കിണർ**
- **Public well/ പൊതുകിണർ**
- **Tanker supply/ ടാങ്കർ വിതരണം**

1. **Source of water used for other household activities (washing, bathing, cleaning, recreation)/**

**മറ്റ് ഗാർഹിക പ്രവർത്തനങ്ങൾക്ക് ഉപയോഗിക്കുന്ന വെള്ളത്തിന്റെ ഉറവിടം (കഴുകൽ, കുളിക്കൽ, വൃത്തിയാക്കൽ, വിനോദം)**

- **Lake water/ തടാകജലം**
- **Pipeline/ പൈപ്പ് ലൈൻ**
- **Open well/ തുറന്ന കിണർ**
- **Own pond/ സ്വന്തം കുളം**
- **Bore well/ കുഴൽക്കിണർ**
- **Public well/ പൊതുകിണർ**
- **Tanker supply/ ടാങ്കർ വിതരണം**

1. **Mode of water treatment before consumption/ ഉപഭോഗത്തിന് മുമ്പ് ജലശുദ്ധീകരണ രീതി**

- **Boiling/ തിളപ്പിക്കുക**
- **Filtering/ ഫിൽട്ടറിംഗ്**
- **None/ ഒന്നുമില്ല**

1. **How frequently do you interact with coastal waters?**

**തീരദേശ ജലവുമായി നിങ്ങൾ എത്ര തവണ ഇടപഴകുന്നു?**

- - - - **Daily/ ദിവസവും**
      - **Weekly/ പ്രതിവാരം**
      - **Rarely/ അപൂർവ്വമായി**

1. **If you interact with coastal waters, what is the primary purpose?**

**നിങ്ങൾ തീരദേശ ജലവുമായി ഇടപഴകുകയാണെങ്കിൽ, എന്താണ് പ്രാഥമിക ലക്ഷ്യം?**

- - **Swimming/ നീന്തൽ**
  - **Fishing/ മത്സ്യബന്ധനം**
  - **Boating / ബോട്ടിംഗ്**
  - **Other (please specify)/ മറ്റുള്ളവ (ദയവായി വ്യക്തമാക്കുക)**

1. **Do you experience shortage in the supply of drinking water?**

**കുടിവെള്ള വിതരണത്തിൽ നിങ്ങൾക്ക് ക്ഷാമം അനുഭവപ്പെടുന്നുണ്ടോ?**

- **Irregular supply/ ക്രമരഹിതമായ വിതരണം,**
- **Regular supply/ പതിവ് വിതരണം,**
- **Supply stops when there is heavy rain or floods/ കനത്ത മഴയോ വെള്ളപ്പൊക്കമോ ഉണ്ടാകുമ്പോൾ വിതരണം നിർത്തുന്നു,**
- **Reduced supply in summer/ വേനൽക്കാലത്ത് വിതരണം കുറയുന്നു**

1. **Do you use disinfectant in the toilet?**

**നിങ്ങൾ ടോയ്‌ലറ്റിൽ അണുനാശിനി ഉപയോഗിക്കാറുണ്ടോ?**

- **Regularly/ പതിവായി**
- **Less frequently/ കുറച്ച് തവണ**
- **Never/ ഒരിക്കലുമില്ല**

1. **Does anyone in your house practice open defecation?**

**നിങ്ങളുടെ വീട്ടിൽ ആരെങ്കിലും തുറസ്സായ മലമൂത്രവിസർജനം നടത്തുന്നുണ്ടോ?**

- **Children <10 years/ 10 വയസ്സിന് താഴെയുള്ള കുട്ടികൾ**
- **Old people >60 years/ 60 വയസ്സിന് മുകളിലുള്ളവർ**
- **People of all age groups/ എല്ലാ പ്രായത്തിലുമുള്ള ആളുകൾ**
- **None/ ആരുമില്ല**

1. **In case of open defecation, how far from any water source do you practice open defecation?**

**തുറസ്സായ സ്ഥലങ്ങളിൽ മലമൂത്രവിസർജ്ജനം നടത്തുന്ന സാഹചര്യത്തിൽ, ഏതെങ്കിലും ജലസ്രോതസ്സിൽ നിന്ന് എത്ര ദൂരെയാണ് നിങ്ങൾ തുറസ്സായ മലമൂത്ര വിസർജ്ജനം നടത്തുന്നത്?**

- **Close to the well/ lake/ river/ sea**

**കിണറിന് / തടാകത്തിന് / നദിക്ക് / കടലിന് സമീപം**

- **Far from the well/ lake/ river/ sea**

**കിണറ്റിൽ നിന്ന് / തടാകത്തിൽ / നദിയിൽ / കടലിൽ നിന്ന് അകലെ**

1. **Frequency of open defecation?**

**തുറസ്സായ സ്ഥലങ്ങളിൽ മലമൂത്രവിസർജ്ജനം ചെയ്യുന്നതിന്റെ ആവൃത്തി?**

- **Regularly/ പതിവായി**
- **Only when toilets are flooded/ കക്കൂസുകളിൽ വെള്ളം നിറയുമ്പോൾ മാത്രം**
- **Never/ ഒരിക്കലും ഇല്ല**

1. **Does your septic tank or compound get flooded?**

**നിങ്ങളുടെ സെപ്റ്റിക് ടാങ്കിലോ കോമ്പൗണ്ടിലോ വെള്ളപ്പൊക്കം ഉണ്ടാകുമോ?**

- **During rainy season/ മഴക്കാലത്ത്**
- **When it is full/ അത് പൂർണ്ണമാകുമ്പോൾ മാത്രം**
- **Only during floods/ വെള്ളപ്പൊക്ക സമയത്ത് മാത്രം**
- **Regularly during high/ spring tides/ ഉയർന്ന വേലിയേറ്റങ്ങളിൽ പതിവായി**
- **Never/ ഒരിക്കലും ഇല്ല**

1. **Distance between your septic tank and drinking water source**

**നിങ്ങളുടെ സെപ്റ്റിക് ടാങ്കും കുടിവെള്ള സ്രോതസ്സും തമ്മിലുള്ള ദൂരം**

- **<5 meter 5 മീറ്ററിൽ താഴെ**
- **5-10 meter 5 മുതൽ 10 മീറ്റർ വരെ**
- **>10 meter 10 മീറ്ററിൽ കൂടുതൽ**

1. **Incidence of Cholera/ ADD/ water borne diseases with any of the following symptoms (Vomiting, Diarrhoea, fever)**

**താഴെപ്പറയുന്ന ഏതെങ്കിലും ലക്ഷണങ്ങളോടെ (ഛർദ്ദി, വയറിളക്കം, പനി) കോളറ/എഡിഡി/ ജലജന്യ രോഗങ്ങൾ)**

- **Monthly പ്രതിമാസ**
- **Yearly വർഷംതോറും**
- **Rarely അപൂർവ്വമായി**

1. **Age group highly affected by above mentioned symptoms**

**(മേൽപ്പറഞ്ഞ ലക്ഷണങ്ങൾ വളരെയേറെ ബാധിക്കുന്ന പ്രായവിഭാഗം)**

- **Children (0-10 years) കുട്ടികൾ (0-10 വയസ്സ്)**
- **Adolescents (11-18 years) കൗമാരക്കാർ (11-18 വയസ്സ്)**
- **Adult males (19-60 years) മുതിർന്ന പുരുഷന്മാർ (19-60 വയസ്സ്)**
- **Adult females (19-60 years) മുതിർന്ന സ്ത്രീകൾ (19-60 വയസ്സ്)**
- **Old people (>60 years) വൃദ്ധർ (60 വയസ്സിനു മുകളിൽ)**

**-------------------------------------------------------------------------------------**

**Thank you for participating in the Citizen Science Water Quality Survey!**

**Your responses will help us understand and improve water quality in Kavaratti.**

**-------------------------------------------------------------------------------------**

**Supplementary File 2**

**File 2. Details of primer sets and PCR conditions used for enumeration of *Vibrio spp*. *Vibrio cholerae* and *E. coli* using quantitative real-time PCR.**

| Gene | Primer | Purpose | Target Organism | Amplicon Size (bp) | Reference |
| --- | --- | --- | --- | --- | --- |
| β-D glucuronidase | UALF: ATGGAATTTCGCCGATTTTGC  UALR: ATTGTTTGCCTCCCTGCTGC | qPCR | *E.coli* | 187 | 1 |
| 16s rRNA | 567F:  GGCGTAAAGCGCATGCAGGT 680R: GAAATTCTACCCCCCTCTACAG | qPCR | *Vibrio spp.* | 113 | 2 |
| OMPw | OMP F:  ACATCAGYTTTGAAGTCCTCGC  OMPR: GTGGTGTAATTCAAACCCGC | qPCR | *V.cholerae* | 191 | 3 |

**References**

1. Heijnen L, Medema G. Quantitative detection of E. coli, E. coli O157 and other shiga toxin producing E. coli in water samples using a culture method combined with real-time PCR. *Journal of Water and Health* 2006; **4**(4): 487-98.

2. Tall A, Teillon A, Boisset C, Delesmont R, Touron‐Bodilis A, Hervio‐Heath D. Real‐time PCR optimization to identify environmental V ibrio spp. strains. *Journal of applied microbiology* 2012; **113**(2): 361-72.

3. Rashid RB, Ferdous J, Tulsiani S, Jensen PKM, Begum A. Development and validation of a novel real-time assay for the detection and quantification of Vibrio cholerae. *Frontiers in public health* 2017; **5**: 109.
